# Supplementary material for: Environmental and genetic effects on tomato seed metabolic balance and its association with germination vigor
Source: PubMed Central journal article supplement (PMC5168813; doi:10.1186/s12864-016-3376-9), 2016-12-19
Supplement: 12864_2016_3376_MOESM4_ESM.pdf [file 12864_2016_3376_MOESM4_ESM.pdf]

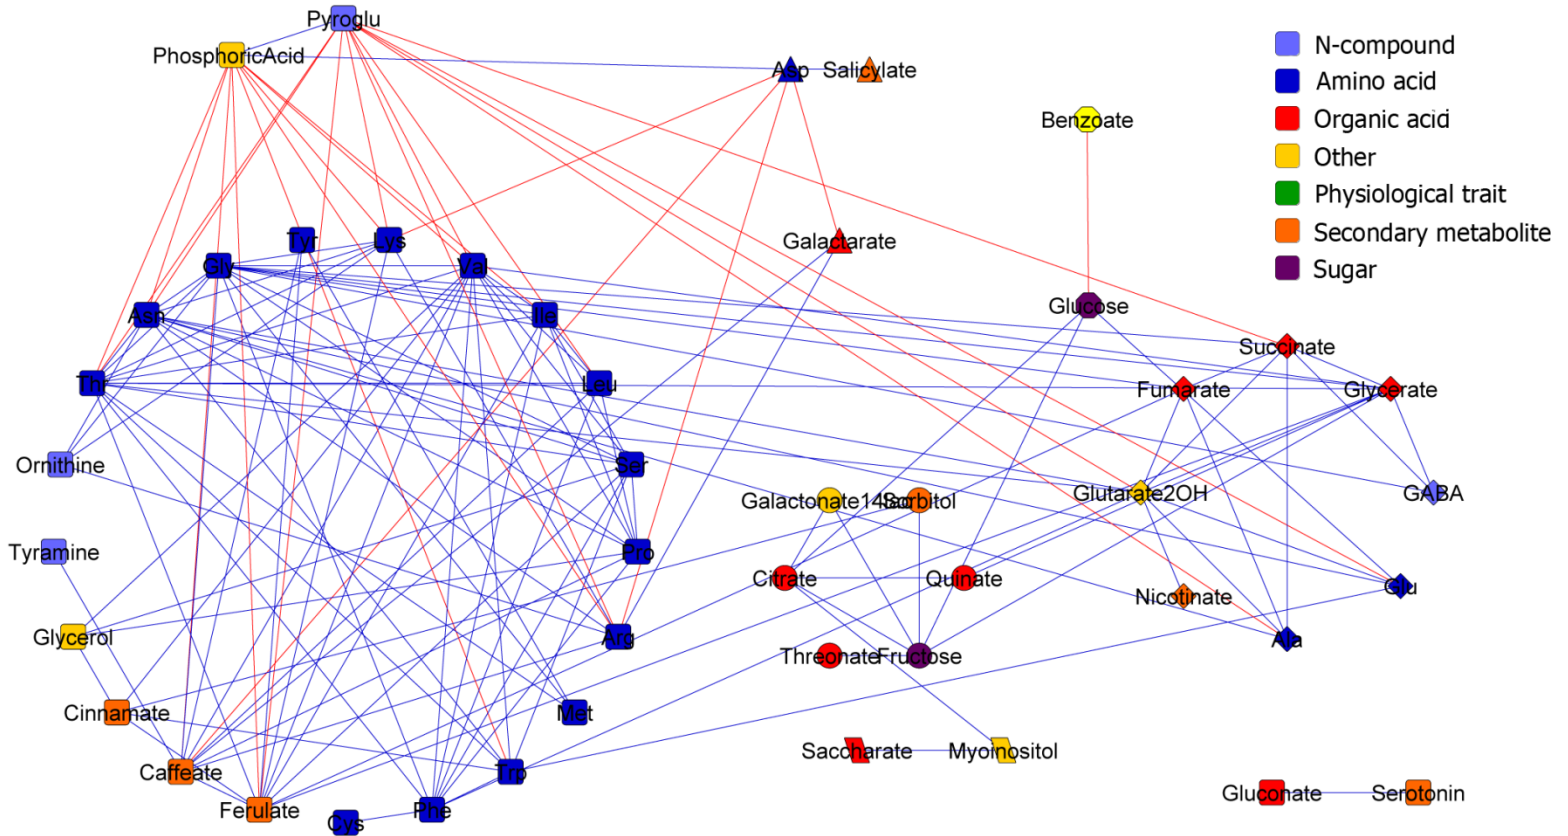

**Figure S1B- Correlation network of metabolites of SDS in season II**

Nodes depict metabolites and germination measures. Metabolite nodes were arranged according to Walktrap communities (also indicated by node shape), and colored by chemical class, as indicated. Edges represent significant ( $p < 0.05$ , FDR;  $|r| > 0.4$ ) correlations. Each community was separated according to positive (blue) and negative (red) correlations.
